# Supplementary material for: Safety of single-dose primaquine as a Plasmodium falciparum gametocytocide: a systematic review and meta-analysis of individual patient data
Source: Springer Nature journal article supplement (doi:10.1186/s12916-022-02504-z), 2022-09-16
Supplement: MOESM4 [file 23504656]

# Risk of bias assessment

|                                                                                         |   |
|-----------------------------------------------------------------------------------------|---|
| Supplementary Table 13. Risk of bias assessment .....                                   | 2 |
| Supplementary Table 14. Individual participant data not available .....                 | 4 |
| Supplementary Figure 12. Sensitivity analysis for the main haematological results ..... | 5 |

**Supplementary Table 13. Risk of bias assessment**

| Study ID | Study design <sup>1</sup> | Random sequence generation (selection bias) | Allocation concealment (selection bias) | Blinding of participants, personnel (performance bias)<br>Hb Day 7, AEs | Blinding of outcomes assessment (detection bias)<br>Hb Day 7, AEs | Incomplete outcome data (attrition bias)<br>Hb Day 7 |      | Other bias<br>AE elicitation method          |
|----------|---------------------------|---------------------------------------------|-----------------------------------------|-------------------------------------------------------------------------|-------------------------------------------------------------------|------------------------------------------------------|------|----------------------------------------------|
|          |                           |                                             |                                         | Primary outcome Hb D7                                                   | Primary outcome Hb D7                                             | n                                                    | %    |                                              |
| 1        | MDA                       | Not applicable                              | Not applicable                          | Open label                                                              | Open label                                                        | 295                                                  | 78%  | Open questions                               |
| 2        | RCT                       | Computer generated                          | Sealed, opaque envelopes                | Open label                                                              | Open label, not clear if Hb staff blinded                         | 692                                                  | 89%  | Open questions, direct for dark/'coke' urine |
| 3        | RCT                       | Computer generated                          | Sealed, opaque envelopes                | Staff unblinded, participants blinded                                   | Open label                                                        | 220                                                  | 97%  | Checklist questions, incl. for dark urine    |
| 4        | RCT                       | Envelope draw                               | Sealed, opaque envelopes                | Open label                                                              | Not reported                                                      | 231                                                  | 71%  | Checklist                                    |
| 5        | RCT                       | Envelope draw                               | Sealed, opaque envelopes                | Only pharmacist, unblinded                                              | Blinded                                                           | 357                                                  | 97%  | Open, some checklist items, incl. dark urine |
| 6        | RCT                       | Computer generated                          | Sealed, opaque envelopes                | Open label                                                              | Open label                                                        | 86                                                   | 92%  | Not reported                                 |
| 7        | RCT                       | Computer generated                          | Sealed, opaque envelopes                | Open label                                                              | Open label                                                        | 50                                                   | 92%  | Checklist questions, Hillman for dark urine  |
| 8        | RCT                       | Computer generated                          | Sealed, opaque envelopes                | Only pharmacist, unblinded                                              | Blinded                                                           | 461                                                  | 100% | Checklist questions, incl. dark urine        |
| 9        | RCT                       | Envelope draw                               | Sealed, opaque envelopes                | Open label                                                              | Open label                                                        | 78                                                   | 88%  | Question dark urine                          |
| 10       | RCT                       | Computer generated                          | Sealed, opaque envelopes                | Open label                                                              | Open label                                                        | 61                                                   | 69%  | Not reported                                 |
| 11       | RCT                       | Computer generated                          | Sealed, opaque envelopes                | Open label                                                              | Hb lab staff blinded, clinical staff unblinded                    | 267                                                  | 89%  | Not reported except Hillman for dark urine   |
| 12       | Cohort                    | Not applicable                              | Not applicable                          | Open label                                                              | Open label                                                        | 94                                                   | 66%  | Open questions, Hillman for dark urine       |
| 13       | RCT                       | Computer generated                          | Sealed, opaque envelopes                | Open label                                                              | Hb lab staff blinded, clinical staff unblinded                    | 103                                                  | 98%  | Checklist questions, incl. for dark urine    |
| 14       | MDA                       | Not applicable                              | Not applicable                          | Open label                                                              | Open label                                                        | 843                                                  | 70%  | Not reported                                 |
| 15       | RCT                       | Computer generated                          | Sealed, opaque envelopes                | Open label                                                              | Open label                                                        | 373                                                  | 98%  | Checklist                                    |
| 16       | RCT                       | Computer generated                          | Sealed, opaque envelopes                | Open label                                                              | Open label                                                        | 139                                                  | 60%  | Open and some checklist items                |
| 17       | RCT                       | Computer generated                          | Sealed, opaque envelopes                | Only pharmacist, unblinded                                              | Blinded                                                           | 114                                                  | 100% | Not reported                                 |

|    |        |                    |                          |                                                                      |            |    |     |                                           |
|----|--------|--------------------|--------------------------|----------------------------------------------------------------------|------------|----|-----|-------------------------------------------|
| 18 | Cohort | Not applicable     | Not applicable           | Open label                                                           | Open label |    |     | Checklist questions, incl. for dark urine |
| 19 | RCT    | Computer generated | Sealed, opaque envelopes | Staff blinded, participants unblinded on request by non-investigator | Blinded    | 81 | 95% | Open and some checklist questions         |
| 20 | MDA    | Not applicable     | Not applicable           | Open label                                                           | Open label |    |     | Not reported                              |

<sup>1</sup>MDA = mass drug administration, RCT = randomised controlled trial; D7 = Day 7

**Supplementary Table 14. Individual participant data not available**

| Author, date                                                                                                                                                       | PubMed ID | Study Design                                             | Location | Year      | ACT              | Follow up (days) | Age                  | G6PD exclusion | Target primaquine dose (mg/kg)                                       | N     | Summary of haemoglobin outcome                                                                                                                                                                                                                                                                                                                                                                                                                                                                                                                                                                                                                         | Summary of adverse events                                                                                                                                                                                                                                                                                  |
|--------------------------------------------------------------------------------------------------------------------------------------------------------------------|-----------|----------------------------------------------------------|----------|-----------|------------------|------------------|----------------------|----------------|----------------------------------------------------------------------|-------|--------------------------------------------------------------------------------------------------------------------------------------------------------------------------------------------------------------------------------------------------------------------------------------------------------------------------------------------------------------------------------------------------------------------------------------------------------------------------------------------------------------------------------------------------------------------------------------------------------------------------------------------------------|------------------------------------------------------------------------------------------------------------------------------------------------------------------------------------------------------------------------------------------------------------------------------------------------------------|
| Arroyo-Arroyo, 2016                                                                                                                                                | 28749756  | 3 sequential dose groups ACT plus primaquine             | Colombia | 2010-2014 | AL               | 7                | All                  | Not tested     | 1) 0.75 day 3, 2) 0.50 day 1 and 0.25 day 3, 3) 0.25 days 1, 2 and 3 | 60    | Not applicable                                                                                                                                                                                                                                                                                                                                                                                                                                                                                                                                                                                                                                         | No volunteers had adverse events possibly associated with the antimalarial treatment. The signs and symptoms observed in all patients were indistinguishable from the common malaria symptoms                                                                                                              |
| Lin, 2017*                                                                                                                                                         | 28591198  | Randomised controlled trial, ACT with/without primaquine | Cambodia | 2012-2014 | DP               | 42               | 18-65                | Severe         | 0.75 day 3                                                           | 101   | Among 8/101 with mild or moderate G6PD deficiency, a greater drop in haemoglobin at day 7 was seen with primaquine but not statistically significant: median fractional reduction in haemoglobin 24.8% (range 0.9% to 29.8%) in 6 given primaquine versus 7.1% (-4.4% and 18.7%) in 2 not given primaquine (p = 0.14). The largest drop was 9.9 g/dL from a baseline of 14.1; all Hgb values were >11.0 g/dL by day 14. In G6PD normal subjects, haemoglobin was only measured to day 3, at which time there was no change in the fractional drop between arms (9.8% versus 9.3% in the primaquine and non-primaquine groups, respectively, p = 0.79). |                                                                                                                                                                                                                                                                                                            |
| Shah, 2013*                                                                                                                                                        | 23587943  | Meta-analysis of sites with / without primaquine         | India    | 2009-2010 | ASSP             | 28               | > 1 year             | Not tested     | 0.75 day 2                                                           | 1372  | Not applicable                                                                                                                                                                                                                                                                                                                                                                                                                                                                                                                                                                                                                                         | Adverse events reported included vomiting (8) and fever (2) in the AS+SP-alone arm and vomiting (14) and jaundice (1) in the primaquine arm. Only 5/14 patients who experienced vomiting did so on the day of primaquine administration. The jaundice occurred in a 5-year-old on day 14 and self-resolved |
| Smithius 1010                                                                                                                                                      | 20832366  | Randomised controlled trial, ACT with/without primaquine | Myanmar  | 2008-2009 | AM, ASAQ, DP, AL | 63               | > 1 year             | Not tested     | 0.75 day                                                             | 808** | No day 7 data                                                                                                                                                                                                                                                                                                                                                                                                                                                                                                                                                                                                                                          | 599 (74%) reported adverse events. 13 (1.6%) vomited within the first hour, none after treatment. The only side-effect attributed to primaquine was abdominal pain.                                                                                                                                        |
| Tun, 2016                                                                                                                                                          | 27036739  | Single arm                                               | Myanmar  | 2013-2014 | DP               | 42               | 6 months to 65 years | Not tested     | 0.25mg/kg day 0                                                      | 116   | There were no clinically significant falls in haemoglobin, or haemoglobinuria                                                                                                                                                                                                                                                                                                                                                                                                                                                                                                                                                                          | Study medications generally well tolerated although 6 vomited day 0 medication, and 1 vomited on day 2. One serious adverse event, a death through road traffic accident 2 weeks after the last visit                                                                                                      |
| AL: artemether-lumefantrine, ASAQ:artesunate amodiaquine, AM:artesunate-mefloquine, ASSP:artesunate sulphadoxine-pyrimthamine, DP: dihydroartemisinin piperaquine, |           |                                                          |          |           |                  |                  |                      |                |                                                                      |       |                                                                                                                                                                                                                                                                                                                                                                                                                                                                                                                                                                                                                                                        |                                                                                                                                                                                                                                                                                                            |
| *Unclear if requested                                                                                                                                              |           |                                                          |          |           |                  |                  |                      |                |                                                                      |       |                                                                                                                                                                                                                                                                                                                                                                                                                                                                                                                                                                                                                                                        |                                                                                                                                                                                                                                                                                                            |
| **Included mixed infections                                                                                                                                        |           |                                                          |          |           |                  |                  |                      |                |                                                                      |       |                                                                                                                                                                                                                                                                                                                                                                                                                                                                                                                                                                                                                                                        |                                                                                                                                                                                                                                                                                                            |

## Supplementary Figure 12. Sensitivity analysis for the main haematological results

Figures show estimates and their 95% CI for the effect of primaquine dose ( in G6PD deficient subjects in the left-hand-side panels and in G6PD normal subjects in the right-hand panels) from the final multivariable model (in blue ) and in the same model re- fitted after exclusion of each study in turn (in green). Two endpoints are presented: absolute change in haemoglobin on Day 7 (upper panels) and risk of moderate anaemia on Day 7 (lower panels). Red line show the effect estimated in the final model.

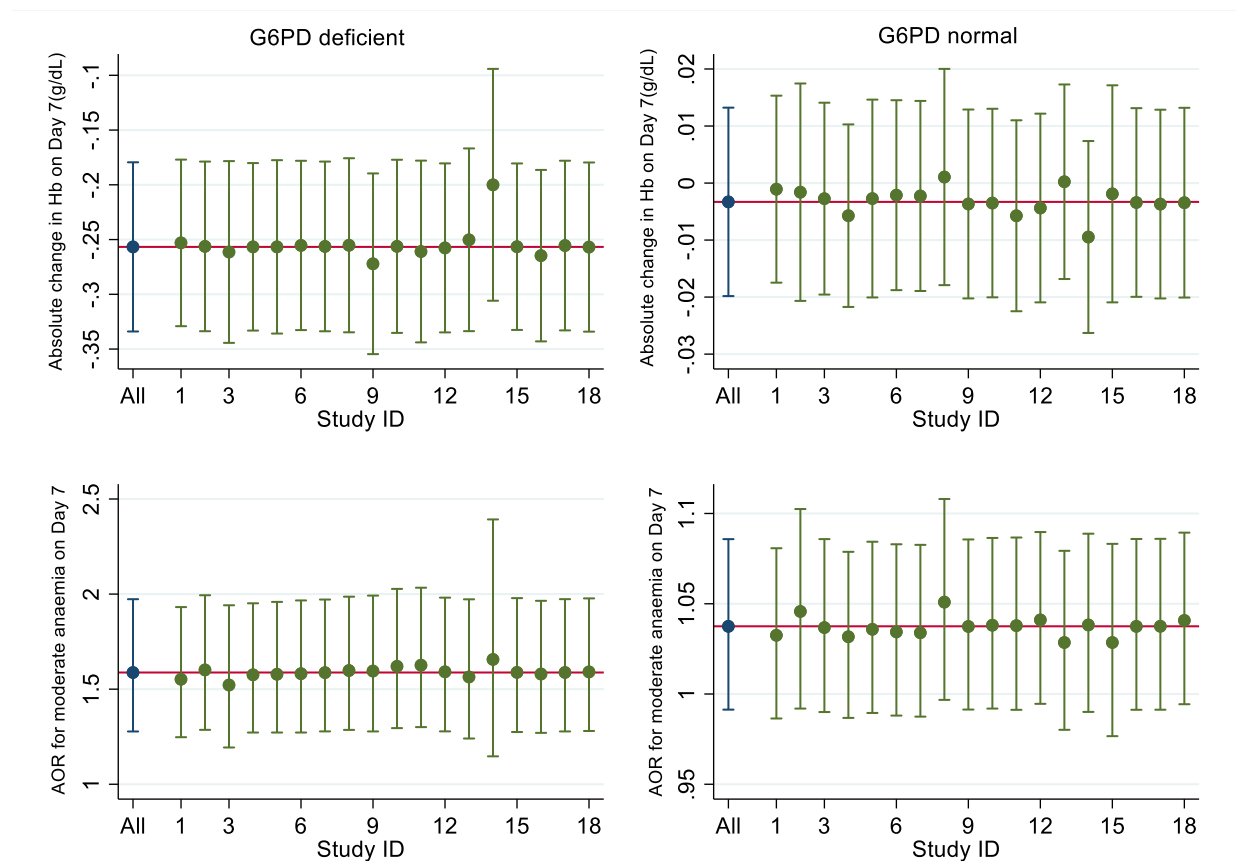

Coefficient of variation for the estimates was (from top left, clockwise) 5.7%, 75.8%, 3.9% and 14.5%.

Large variability for the second model was due to the estimates being very close to 0, nonetheless the results were very consistent throughout.
